# Supplementary material for: An overview of the chemical constituents from the genus Delphinium reported in the last four decades
Source: Royal Society of Chemistry journal article supplement (doi:10.1039/d0ra00813c), 2020-01-01
Supplement: d0ra00813c1.pdf [file d0ra00813c1.pdf]

## Electronic Supplementary Information

An overview of the chemical constituents from the genus *Delphinium* reported in the last four decades

Tianpeng Yin<sup>a,b</sup>, Le Cai<sup>b\*</sup> and Zhongtao Ding<sup>b\*</sup>

| Source                                      | DAs                                             | Sub-type                         | Ref. |
|---------------------------------------------|-------------------------------------------------|----------------------------------|------|
| <i>D. albiflorum</i>                        | deacetylheterophylloidine ( <b>397</b> )        | C-3                              | 1    |
| <i>D. alpinum</i>                           | alpinine ( <b>219</b> )                         | B-1                              | 2    |
| <i>D. andersonii</i>                        | andersonine ( <b>252</b> )                      | B-1                              | 3    |
|                                             | 14-deacetylnudicauline ( <b>253</b> )           | B-1                              | 3    |
|                                             | andersobine ( <b>366</b> )                      | C-1                              | 4    |
| <i>D. anhweiense</i>                        | anhweidelphinine (zaliline, <b>66</b> )         | B-1                              | 5, 6 |
| <i>D. anthriscifolium</i> var. <i>majus</i> | anthriscifolcone A ( <b>1</b> )                 | A-1                              | 7    |
|                                             | anthriscifolcone B ( <b>2</b> )                 | A-1                              | 7    |
|                                             | anthriscifoltine A ( <b>3</b> )                 | A-1                              | 8    |
|                                             | anthriscifoltine B ( <b>4</b> )                 | A-1                              | 8    |
|                                             | anthriscifoltine C ( <b>5</b> )                 | A-1                              | 9    |
|                                             | anthriscifoltine D ( <b>6</b> )                 | A-1                              | 9    |
|                                             | anthriscifoltine E ( <b>7</b> )                 | A-1                              | 9    |
|                                             | anthriscifoltine F ( <b>8</b> )                 | A-1                              | 9    |
|                                             | anthriscifoltine G ( <b>9</b> )                 | A-1                              | 9    |
|                                             | anthriscifolrine A ( <b>105</b> )               | B-1                              | 10   |
|                                             | anthriscifolrine B ( <b>106</b> )               | B-1                              | 10   |
|                                             | anthriscifolrine C ( <b>107</b> )               | B-1                              | 10   |
|                                             | anthriscifolrine D ( <b>108</b> )               | B-1                              | 10   |
|                                             | anthriscifolrine E ( <b>109</b> )               | B-1                              | 10   |
|                                             | anthriscifolrine F ( <b>110</b> )               | B-1                              | 10   |
|                                             | anthriscifolsine A ( <b>325</b> )               | C-1                              | 10   |
|                                             | anthriscifolsine B ( <b>338</b> )               | C-1                              | 10   |
|                                             | anthriscifolsine C ( <b>339</b> )               | C-1                              | 10   |
|                                             | <i>D. anthriscifolium</i> var. <i>savatieri</i> | anthriscifolcine A ( <b>10</b> ) | A-1  |
| anthriscifolcine B ( <b>11</b> )            |                                                 | A-1                              | 11   |
| anthriscifolcine C ( <b>12</b> )            |                                                 | A-1                              | 11   |
| anthriscifolcine D ( <b>13</b> )            |                                                 | A-1                              | 11   |
| anthriscifolcine E ( <b>14</b> )            |                                                 | A-1                              | 11   |
| anthriscifolcine F ( <b>15</b> )            |                                                 | A-1                              | 12   |
| anthriscifolcine G ( <b>16</b> )            |                                                 | A-1                              | 12   |
| anthriscifoldine A ( <b>161</b> )           |                                                 | B-1                              | 12   |
| anthriscifoldine B ( <b>119</b> )           |                                                 | B-1                              | 12   |

---

|                                    |                                           |     |    |
|------------------------------------|-------------------------------------------|-----|----|
|                                    | anthriscifoldine C ( <b>120</b> )         | B-1 | 12 |
|                                    | anthriscifolmine C ( <b>341</b> )         | C-1 | 13 |
|                                    | anthriscifolmine J ( <b>330</b> )         | C-1 | 14 |
|                                    | anthriscifolmine D ( <b>394</b> )         | C-2 | 15 |
|                                    | anthriscifolmine E ( <b>391</b> )         | C-2 | 15 |
|                                    | anthriscifolmine F ( <b>390</b> )         | C-2 | 15 |
|                                    | anthriscifolmine G ( <b>393</b> )         | C-2 | 15 |
|                                    | anthriscifolmine H ( <b>392</b> )         | C-2 | 15 |
|                                    | anthriscifolmine I ( <b>396</b> )         | C-3 | 14 |
|                                    | anthriscifolmine A ( <b>416</b> )         | C-5 | 13 |
|                                    | anthriscifolmine B ( <b>415</b> )         | C-5 | 13 |
| <i>D. ajacis</i>                   | ajacisine A ( <b>210</b> )                | B-1 | 16 |
|                                    | ajacisine B ( <b>211</b> )                | B-1 | 16 |
|                                    | ajacisine C ( <b>212</b> )                | B-1 | 16 |
|                                    | ajacisine D ( <b>213</b> )                | B-1 | 16 |
|                                    | ajacisine E ( <b>214</b> )                | B-1 | 16 |
|                                    | ajadinine ( <b>67</b> )                   | B-1 | 17 |
|                                    | 19-oxoanthranoyllycotonine ( <b>255</b> ) | B-1 | 18 |
|                                    | 19-oxodelphatin ( <b>35</b> )             | B-1 | 18 |
|                                    | ajabicine ( <b>407</b> )                  | C-4 | 19 |
|                                    | delajacine ( <b>205</b> )                 | B-1 | 20 |
|                                    | delajacirine ( <b>206</b> )               | B-1 | 20 |
|                                    | delajadine ( <b>207</b> )                 | B-1 | 20 |
|                                    | ajanine ( <b>208</b> )                    | B-1 | 20 |
| <i>D. barbeyi</i>                  | barbeline ( <b>56</b> )                   | B-1 | 21 |
|                                    | 6-deoxydelpheline ( <b>151</b> )          | B-1 | 21 |
|                                    | 14-acetyldictyocarpine ( <b>140</b> )     | B-1 | 22 |
|                                    | barbinine ( <b>249</b> )                  | B-1 | 22 |
|                                    | barbinidine ( <b>148</b> )                | B-1 | 22 |
|                                    | barbaline ( <b>385</b> )                  | C-2 | 23 |
|                                    | barbisine ( <b>395</b> )                  | C-2 | 24 |
| <i>D. barbeyi (D. occidentale)</i> | delbidine ( <b>367</b> )                  | C-1 | 25 |
| <i>D. bicolor</i>                  | bicolorine 6-O-acetate ( <b>301</b> )     | B-2 | 26 |
| <i>D. bonvalotii</i>               | delbine ( <b>17</b> )                     | A-1 | 27 |
|                                    | delboxine ( <b>18</b> )                   | A-1 | 27 |
|                                    | bonvalotidine C ( <b>118</b> )            | B-1 | 28 |
|                                    | bonvalotidine A ( <b>136</b> )            | B-1 | 28 |
|                                    | bonvalotidine B ( <b>137</b> )            | B-1 | 28 |
|                                    | delbonine ( <b>179</b> )                  | B-1 | 27 |
|                                    | delbotine ( <b>180</b> )                  | B-1 | 27 |
| <i>D. brunonianum</i>              | delbruline ( <b>104</b> )                 | B-1 | 29 |
|                                    | delbrunine ( <b>114</b> )                 | B-1 | 29 |
|                                    | delbrusine ( <b>138</b> )                 | B-1 | 29 |
|                                    | delbruninol ( <b>121</b> )                | B-1 | 30 |

---

|                          |                                         |     |        |
|--------------------------|-----------------------------------------|-----|--------|
|                          | brunonine (405)                         | C-4 | 31     |
| <i>D. buschianum</i>     | budelphine (36)                         | B-1 | 32     |
| <i>D. campylocentrum</i> | campylocine (25)                        | B-1 | 33     |
|                          | campyloine (133)                        | B-1 | 33     |
| <i>D. caeruleum</i>      | caerudelphinine A (95)                  | B-1 | 34     |
|                          | caerunine (60)                          | B-1 | 35, 36 |
|                          | caeruleine (264)                        | B-2 | 37     |
| <i>D. carduchorum</i>    | carduchoron (398)                       | C-3 | 38     |
|                          | delcarduchol (399)                      | C-3 | 38     |
| <i>D. carolinianum</i>   | delcaroline (44)                        | B-1 | 39     |
| <i>D. cardiopetalum</i>  | cardiopine (357)                        | C-1 | 40     |
|                          | cardiopinine (358)                      | C-1 | 40     |
|                          | cardiopimine (359)                      | C-1 | 40     |
|                          | cardiopedine (360)                      | C-1 | 40     |
|                          | cardiodine (329)                        | C-1 | 40     |
|                          | cardiopetamine (362)                    | C-1 | 41     |
|                          | 15-acetylcar cardiopetamine (363)       | C-1 | 41     |
|                          | cardiopetalidine (184)                  | B-1 | 42     |
|                          | 14-benzoylnudicaulidine (189)           | B-1 | 43     |
|                          | 14-isobutyrylnudicaulidine (190)        | B-1 | 43     |
|                          | 14-(2-methylbutyryl)nudicaulidine (191) | B-1 | 43     |
|                          | 14-cis-cinnamoylnudicaulidine (192)     | B-1 | 43     |
|                          | 14-trans-cinnamoylnudicaulidine (193)   | B-1 | 43     |
|                          | cardiopetaline (259)                    | B-2 | 42     |
|                          | cardiopetaline (290)                    | B-2 | 42     |
|                          | 8-O-methylsachaconitine (296)           | B-2 | 43     |
|                          | cardionidine (402)                      | C-3 | 44     |
|                          | $\beta$ -acetylhetisinone (373)         | C-1 | 45     |
| <i>D. cashmirianum</i>   | cashmiradelphine (248)                  | B-1 | 46     |
| <i>D. chrysotrichum</i>  | delphatisine A (412)                    | C-4 | 47     |
|                          | delphatisine B (411)                    | C-4 | 47     |
|                          | delphatisine C (410)                    | C-4 | 48     |
|                          | delphatisine D (413)                    | C-4 | 49     |
|                          | chrysotrichumine A (77)                 | B-1 | 49     |
| <i>D. confusum</i>       | 14-acetylnudicaulidine (198)            | B-1 | 50     |
|                          | 18-deoxylycoctonine (199)               | B-1 | 50     |
|                          | 14-acetylkarakoline (298)               | B-2 | 51     |
|                          | 14-methylisotalatisidine (306)          | B-2 | 52     |
|                          | 14-acetylkaracolone (315)               | B-2 | 51     |
| <i>D. corymbosum</i>     | delcorinine (112)                       | B-1 | 53     |
|                          | cordizine (417)                         | C-5 | 54     |
| <i>D. corumbosum</i>     | demethylenedelpheline (200)             | B-1 | 55     |
|                          | corumdephine (130)                      | B-1 | 56     |
|                          | corumdefine (102)                       | B-1 | 57     |

|                                            |                                                                 |                            |     |    |
|--------------------------------------------|-----------------------------------------------------------------|----------------------------|-----|----|
| <i>D. cossonianum</i>                      | 8- <i>O</i> -cinnamoylgraciline ( <b>29</b> )                   | B-1                        | 58  |    |
|                                            | cossonine ( <b>361</b> )                                        | C-1                        | 58  |    |
|                                            | cossonidine (davisin, <b>333</b> )                              | C-1                        | 59  |    |
| <i>D. crispulum</i>                        | delphicrispuline ( <b>22</b> )                                  | A-2                        | 60  |    |
|                                            | crispulidine ( <b>268</b> )                                     | B-2                        | 60  |    |
| <i>D. cuneatum</i>                         | 16-demethoxymethyllycaconitine ( <b>223</b> )                   | B-1                        | 61  |    |
|                                            | 16-demethoxydelavaine A ( <b>239</b> )                          | B-1                        | 62  |    |
|                                            | 16-demethoxydelavaine B ( <b>240</b> )                          | B-1                        | 62  |    |
| <i>D. cyphoplectrum</i>                    | cyphoplectine ( <b>272</b> )                                    | B-2                        | 63  |    |
| <i>D. davisii</i>                          | davisinol ( <b>332</b> )                                        | C-1                        | 64  |    |
|                                            | 18-benzoyldavisinol ( <b>331</b> )                              | C-1                        | 64  |    |
| <i>D. davidii</i>                          | davidisine A ( <b>185</b> )                                     | B-1                        | 65  |    |
|                                            | davidisine B ( <b>46</b> )                                      | B-1                        | 65  |    |
| <i>D. delavayi</i> var. <i>pogonanthum</i> | delavaine A ( <b>254</b> )                                      | B-1                        | 66  |    |
|                                            | delavaine B ( <b>204</b> )                                      | B-1                        | 66  |    |
| <i>D. densiflorum</i>                      | delphidenine ( <b>162</b> )                                     | B-1                        | 67  |    |
| <i>D. denudatum</i>                        | 1 $\beta$ -hydroxy,14 $\beta$ -acetylcondelphine ( <b>317</b> ) | B-2                        | 68  |    |
|                                            | jadwarine-A ( <b>270</b> )                                      | B-2                        | 68  |    |
|                                            | jadwarine-B ( <b>262</b> )                                      | B-2                        | 68  |    |
|                                            | 8-acetylheterophyllisine ( <b>319</b> )                         | B-3                        | 69  |    |
| <i>D. elatum</i>                           | elapacigine ( <b>153</b> )                                      | B-1                        | 70  |    |
|                                            | <i>N</i> -deethyl- <i>N</i> -formylpaciline ( <b>39</b> )       | B-1                        | 70  |    |
|                                            | <i>N</i> -deethyl- <i>N</i> -formylpacinine ( <b>40</b> )       | B-1                        | 70  |    |
|                                            | <i>N</i> -formyl-4,19-secoyunnadelphinine ( <b>52</b> )         | B-1                        | 70  |    |
|                                            | isodelpheline ( <b>91</b> )                                     | B-1                        | 71  |    |
|                                            | eladine ( <b>94</b> )                                           | B-1                        | 71  |    |
|                                            | elasine ( <b>117</b> )                                          | B-1                        | 71  |    |
|                                            | 19-oxoisodelpheline ( <b>31</b> )                               | B-1                        | 72  |    |
|                                            | melpheline ( <b>89</b> )                                        | B-1                        | 72  |    |
|                                            | <i>N</i> -deethyl-19-oxoisodelpheline ( <b>33</b> )             | B-1                        | 72  |    |
|                                            | <i>N</i> -deethyl-19-oxodelpheline ( <b>34</b> )                | B-1                        | 72  |    |
|                                            | <i>N</i> -formyl-4,19-secopacinine ( <b>51</b> )                | B-1                        | 73  |    |
|                                            | iminoisodelpheline ( <b>53</b> )                                | B-1                        | 73  |    |
|                                            | iminodelpheline ( <b>54</b> )                                   | B-1                        | 73  |    |
|                                            | iminopaciline ( <b>55</b> )                                     | B-1                        | 73  |    |
|                                            | 6-dehydroeladine ( <b>115</b> )                                 | B-1                        | 73  |    |
|                                            | elapacidine ( <b>173</b> )                                      | B-1                        | 73  |    |
|                                            | pacifidine ( <b>65</b> )                                        | B-1                        | 74  |    |
|                                            | pacifiline ( <b>37</b> )                                        | B-1                        | 74  |    |
|                                            | pacifinine ( <b>38</b> )                                        | B-1                        | 74  |    |
|                                            | pacidine ( <b>147</b> )                                         | B-1                        | 74  |    |
|                                            | delatisine ( <b>326</b> )                                       | C-1                        | 75  |    |
|                                            | <i>(D. elatum</i> var. <i>Black Night</i> )                     | blacknidine ( <b>177</b> ) | B-1 | 76 |
|                                            |                                                                 | blacknine ( <b>122</b> )   | B-1 | 76 |

|                                                    |                                             |                           |        |    |
|----------------------------------------------------|---------------------------------------------|---------------------------|--------|----|
| <i>D. excelsum</i>                                 | 10-hydroxymethyllycaconitine ( <b>234</b> ) | B-1                       | 77     |    |
|                                                    | 18-O-methyldeleterine ( <b>42</b> )         | B-1                       | 77     |    |
|                                                    | 10-hydroxynudicaulidine ( <b>43</b> )       | B-1                       | 77     |    |
| <i>D. fangshanense</i>                             | 16-demethyldelesoline ( <b>188</b> )        | B-1                       | 78     |    |
| <i>D. flexuosum</i>                                | delphiniflexine ( <b>282</b> )              | B-2                       | 79     |    |
|                                                    | flexiosine ( <b>334</b> )                   | C-1                       | 80     |    |
| <i>D. fissum</i> subsp. <i>anatolicum</i>          | fissumine ( <b>364</b> )                    | C-1                       | 81     |    |
|                                                    | delfissinol ( <b>365</b> )                  | C-1                       | 81     |    |
| <i>D. formosum</i>                                 | N-acetyldelectine ( <b>244</b> )            | B-1                       | 82     |    |
| <i>D. laxicymosum</i> var. <i>pilostachyum</i>     | laxipilostine ( <b>335</b> )                | C-1                       | 83     |    |
|                                                    | laxipilosdine ( <b>336</b> )                | C-1                       | 83     |    |
|                                                    | laxipilosline ( <b>337</b> )                | C-1                       | 83     |    |
|                                                    | laxicyminine ( <b>26</b> )                  | B-1                       | 84     |    |
|                                                    | laxicymine ( <b>24</b> )                    | B-1                       | 84     |    |
|                                                    | laxicymisine ( <b>131</b> )                 | B-1                       | 84     |    |
|                                                    | <i>D. geyeri</i>                            | geyerine ( <b>370</b> )   | C-1    | 85 |
|                                                    |                                             | geyeridine ( <b>371</b> ) | C-1    | 85 |
|                                                    |                                             | geyerinine ( <b>372</b> ) | C-1    | 85 |
|                                                    | <i>D. glaucescens</i>                       | glaucenine ( <b>141</b> ) | B-1    | 86 |
| glaucerine ( <b>142</b> )                          |                                             | B-1                       | 86     |    |
| glaucephine (14-benzoyldictyocarpine, <b>143</b> ) |                                             | B-1                       | 86, 87 |    |
| glaucedine ( <b>194</b> )                          |                                             | B-1                       | 86     |    |
| <i>D. glaucum</i>                                  | geyerline ( <b>233</b> )                    | B-1                       | 88     |    |
| <i>D. giraldii</i>                                 | giraldine A ( <b>154</b> )                  | B-1                       | 89     |    |
|                                                    | giraldine B ( <b>155</b> )                  | B-1                       | 89     |    |
|                                                    | giraldine C ( <b>156</b> )                  | B-1                       | 89     |    |
|                                                    | giraldine D ( <b>157</b> )                  | B-1                       | 90     |    |
|                                                    | giraldine E ( <b>158</b> )                  | B-1                       | 90     |    |
|                                                    | giraldine F ( <b>159</b> )                  | B-1                       | 90     |    |
|                                                    | giraldine G ( <b>228</b> )                  | B-1                       | 91     |    |
|                                                    | giraldine H ( <b>229</b> )                  | B-1                       | 91     |    |
|                                                    | giraldine I ( <b>21</b> )                   | A-2                       | 91     |    |
| <i>D. grandiflorum</i>                             | grandiflorine (uraline, <b>235</b> )        | B-1                       | 92     |    |
|                                                    | grandifloricine ( <b>30</b> )               | B-1                       | 93     |    |
|                                                    | grandifloticine ( <b>247</b> )              | B-1                       | 93     |    |
|                                                    | grandiflodine B ( <b>320</b> )              | B-4                       | 94     |    |
|                                                    | delgramine ( <b>355</b> )                   | C-1                       | 95     |    |
|                                                    | delgrandine ( <b>386</b> )                  | C-2                       | 96     |    |
|                                                    | acetylgrandine ( <b>387</b> )               | C-2                       | 96     |    |
|                                                    | grandiflodine A ( <b>324</b> )              | C-1                       | 94     |    |
|                                                    | <i>D. gracile</i>                           | gracinine ( <b>168</b> )  | B-1    | 97 |
| graciline ( <b>28</b> )                            |                                             | B-1                       | 98     |    |

|                                              |                                                                |     |     |
|----------------------------------------------|----------------------------------------------------------------|-----|-----|
|                                              | 8-methoxykarakoline ( <b>283</b> )                             | B-2 | 99  |
|                                              | delphigraciline ( <b>328</b> )                                 | C-1 | 99  |
|                                              | 14-hydroxyhetisinone <i>N</i> -oxide ( <b>327</b> )            | C-1 | 99  |
| <i>D. gueneri</i>                            | 14-methyl peregrine ( <b>285</b> )                             | B-2 | 100 |
|                                              | <i>N</i> -deethyl-14- <i>O</i> -methylperegrine ( <b>299</b> ) | B-2 | 100 |
|                                              | guenerin ( <b>300</b> )                                        | B-2 | 100 |
| <i>D. gyalanum</i>                           | gyalanine A ( <b>216</b> )                                     | B-1 | 101 |
|                                              | gyalanine B ( <b>217</b> )                                     | B-1 | 101 |
| <i>D. honanense</i>                          | honatisine ( <b>403</b> )                                      | C-4 | 102 |
| <i>D. kamaonense</i> var.                    | glabredelphinine ( <b>160</b> )                                | B-1 | 103 |
| <i>glabrescens</i>                           |                                                                |     |     |
| <i>D. kohatense</i>                          | kohatenine ( <b>271</b> )                                      | B-2 | 104 |
| <i>D. iliense</i>                            | delcoridine ( <b>123</b> )                                     | B-1 | 105 |
|                                              | iliensine A ( <b>90</b> )                                      | B-1 | 106 |
|                                              | iliensine B ( <b>124</b> )                                     | B-1 | 106 |
| <i>D. linearilobum</i>                       | linearilobin ( <b>274</b> )                                    | B-2 | 107 |
| <i>D. leptocarpum</i>                        | leptanine ( <b>323</b> )                                       | C-1 | 108 |
| <i>D. leroyi</i>                             | leroyine 14- <i>O</i> -acetate ( <b>182</b> )                  | B-1 | 109 |
|                                              | leroyine ( <b>187</b> )                                        | B-1 | 109 |
| <i>D. macrocentrum</i>                       | macrocentridine ( <b>45</b> )                                  | B-1 | 110 |
|                                              | macrocentrine ( <b>401</b> )                                   | C-3 | 110 |
| <i>D. majus</i>                              | majusine C ( <b>163</b> )                                      | B-1 | 111 |
|                                              | majusine A ( <b>218</b> )                                      | B-1 | 111 |
|                                              | majusine B ( <b>127</b> )                                      | B-1 | 111 |
|                                              | majusine D ( <b>164</b> )                                      | B-1 | 112 |
|                                              | majusidine A ( <b>346</b> )                                    | C-1 | 111 |
|                                              | majusidine B ( <b>347</b> )                                    | C-1 | 111 |
|                                              | majusimine A ( <b>388</b> )                                    | C-2 | 111 |
|                                              | majusimine B ( <b>389</b> )                                    | C-2 | 111 |
|                                              | majusimine C ( <b>379</b> )                                    | C-2 | 111 |
|                                              | majusimine D ( <b>384</b> )                                    | C-2 | 111 |
| <i>D. menziesii</i>                          | delmenzine ( <b>103</b> )                                      | B-1 | 113 |
| <i>D. mollipilum</i>                         | molline ( <b>100</b> )                                         | B-1 | 114 |
| <i>D. munzianum</i>                          | 14-acetyl peregrine ( <b>284</b> )                             | B-2 | 115 |
|                                              | 14- <i>O</i> -benzoylperegrine ( <b>292</b> )                  | B-2 | 115 |
|                                              | munzianone ( <b>293</b> )                                      | B-2 | 115 |
|                                              | munzianine ( <b>294</b> )                                      | B-2 | 115 |
|                                              | 10-hydroxyperegrine ( <b>266</b> )                             | B-2 | 115 |
| <i>D. naviculare</i> var. <i>lasiocarpum</i> | navicularine ( <b>178</b> )                                    | B-1 | 116 |
|                                              | naviconine ( <b>23</b> )                                       | A-2 | 117 |
|                                              | naviculine ( <b>75</b> )                                       | B-1 | 117 |
|                                              | naviconitine ( <b>273</b> )                                    | B-2 | 117 |
| <i>D. nordhagenii</i>                        | nordhagenine A ( <b>113</b> )                                  | B-1 | 118 |
|                                              | nordhagenine B ( <b>134</b> )                                  | B-1 | 118 |

|                        |                                                                   |     |     |
|------------------------|-------------------------------------------------------------------|-----|-----|
|                        | nordhagenine C ( <b>135</b> )                                     | B-1 | 118 |
| <i>D. nudicaule</i>    | nudicaulamine ( <b>111</b> )                                      | B-1 | 119 |
|                        | nudicauline ( <b>222</b> )                                        | B-1 | 119 |
|                        | nudicaulidine ( <b>186</b> )                                      | B-1 | 119 |
| <i>D. nuttallianum</i> | bearline ( <b>236</b> )                                           | B-1 | 120 |
|                        | 14-acetylbearline ( <b>237</b> )                                  | B-1 | 120 |
|                        | 16-deacetylgeyerline ( <b>238</b> )                               | B-1 | 120 |
|                        | desacetyl-6- <i>epi</i> pubescenine ( <b>196</b> )                | B-1 | 121 |
|                        | delectinine 14- <i>O</i> -acetate ( <b>197</b> )                  | B-1 | 121 |
|                        | 6- <i>epi</i> -pubescenine ( <b>170</b> )                         | B-1 | 122 |
|                        | nuttallianine ( <b>281</b> )                                      | B-2 | 122 |
|                        | 8- <i>O</i> -methylkarasamine ( <b>279</b> )                      | B-2 | 122 |
|                        | 6- <i>epi</i> -neolinine ( <b>303</b> )                           | B-2 | 122 |
|                        | 6- <i>epi</i> -neolinine 14- <i>O</i> -acetate ( <b>302</b> )     | B-2 | 121 |
|                        | nuttalline ( <b>304</b> )                                         | B-2 | 121 |
|                        | bicolorine 14- <i>O</i> -acetate ( <b>305</b> )                   | B-2 | 121 |
|                        | hetisine 13- <i>O</i> -acetate ( <b>340</b> )                     | C-1 | 123 |
|                        | delnuttaline ( <b>375</b> )                                       | C-1 | 124 |
|                        | delnuttidine ( <b>376</b> )                                       | C-1 | 124 |
|                        | delnuttine ( <b>377</b> )                                         | C-1 | 124 |
|                        | karasamine 8- <i>O</i> -acetate ( <b>275</b> )                    | B-2 | 124 |
|                        | 12 $\beta$ -hydroxykarasamine ( <b>276</b> )                      | B-2 | 124 |
|                        | 12 $\beta$ -hydroxykarasamine 8- <i>O</i> -acetate ( <b>277</b> ) | B-2 | 124 |
|                        | 1- <i>epi</i> -12 $\beta$ -hydroxykarasamine ( <b>278</b> )       | B-2 | 124 |
| <i>D. occidentale</i>  | occidentaline ( <b>149</b> )                                      | B-1 | 125 |
|                        | occidentalidine ( <b>201</b> )                                    | B-1 | 125 |
|                        | 6-acetyldelpheline ( <b>150</b> )                                 | B-1 | 125 |
| <i>D. orthocentrum</i> | orthocentrine ( <b>63</b> )                                       | B-1 | 126 |
|                        | deacetylswinanine A ( <b>85</b> )                                 | B-1 | 126 |
| <i>D. pacific</i>      | pacinine ( <b>92</b> )                                            | B-1 | 127 |
|                        | paciline ( <b>145</b> )                                           | B-1 | 127 |
| <i>D. pentagynum</i>   | dihydropentagynine ( <b>203</b> )                                 | B-1 | 128 |
|                        | dihydrogadesine ( <b>183</b> )                                    | B-1 | 128 |
|                        | 14-acetyldihydrogadesine ( <b>195</b> )                           | B-1 | 128 |
|                        | 14-demethyl-14-isobutyryl                                         | B-1 | 129 |
|                        | anhweidelphinine ( <b>68</b> )                                    |     |     |
|                        | 14-demethyl-14-acetyl                                             | B-1 | 129 |
|                        | anhweidelphinine ( <b>64</b> )                                    |     |     |
|                        | pentagynine ( <b>258</b> )                                        | B-2 | 128 |
|                        | 2-dehydrodeacetylheterophylloidine ( <b>400</b> )                 | C-3 | 129 |
|                        | 13-(2-methylbutyryl)azitine ( <b>406</b> )                        | C-4 | 130 |
| <i>D. peregrinum</i>   | pergilone ( <b>166</b> )                                          | B-1 | 131 |

|                                                 |                                               |     |             |
|-------------------------------------------------|-----------------------------------------------|-----|-------------|
|                                                 | delhiperegrine ( <b>165</b> )                 | B-1 | 131         |
|                                                 | peregrine ( <b>280</b> )                      | B-2 | 132         |
|                                                 | 6-deacetyl-10-hydroxyperegrine ( <b>269</b> ) | B-2 | 133         |
| <i>D. peregrinum</i> var. <i>elongatum</i>      | dehydrobicoloridine ( <b>260</b> )            | B-2 | 134         |
|                                                 | bicoloridine alcohol ( <b>295</b> )           | B-2 | 134         |
|                                                 | peregrinine ( <b>261</b> )                    | B-2 | 134         |
| <i>D. pictum</i>                                | pictumine ( <b>313</b> )                      | B-2 | 135         |
| <i>D. poltoratskii</i>                          | delpoline ( <b>263</b> )                      | B-2 | 136         |
| <i>D. potaninii</i>                             | potanisine A ( <b>171</b> )                   | B-1 | 137         |
|                                                 | potanisine B ( <b>47</b> )                    | B-1 | 137         |
|                                                 | potanisine C ( <b>50</b> )                    | B-1 | 138         |
|                                                 | potanisine D ( <b>48</b> )                    | B-1 | 138         |
|                                                 | potanisine E ( <b>49</b> )                    | B-1 | 138         |
|                                                 | potanidine A ( <b>245</b> )                   | B-1 | 139         |
|                                                 | potanidine B ( <b>246</b> )                   | B-1 | 139         |
|                                                 | potanisine F ( <b>226</b> )                   | B-1 | 140         |
|                                                 | potanisine G ( <b>227</b> )                   | B-1 | 140         |
|                                                 | potanine ( <b>172</b> )                       | B-1 | 141         |
|                                                 | leueandine ( <b>322</b> )                     | B-5 | 140         |
| <i>D. potaninii</i> var. <i>jiufengshanense</i> | jiufengdine ( <b>224</b> )                    | B-1 | 142         |
|                                                 | jiufengtine ( <b>225</b> )                    | B-1 | 142         |
| <i>D. pseudoaemulans</i>                        | pseudophnine A ( <b>76</b> )                  | B-1 | 143         |
|                                                 | pseudophnine B ( <b>74</b> )                  | B-1 | 143         |
|                                                 | pseudophnine C ( <b>73</b> )                  | B-1 | 143         |
|                                                 | pseudophnine D ( <b>71</b> )                  | B-1 | 143         |
|                                                 | pseudorenine A ( <b>69</b> )                  | B-1 | 143         |
|                                                 | pseudorenine B ( <b>70</b> )                  | B-1 | 143         |
|                                                 | pseudonidine A ( <b>58</b> )                  | B-1 | 143         |
|                                                 | pseudonidine B ( <b>87</b> )                  | B-1 | 143         |
| <i>D. pyrimadale</i>                            | 8-acetylcondelphine ( <b>289</b> )            | B-2 | 144         |
| <i>D. retropilosum</i>                          | delretine ( <b>146</b> )                      | B-1 | 145         |
| <i>D. roylei</i>                                | royleinine ( <b>287</b> )                     | B-2 | 146         |
| <i>D. shawurense</i>                            | sharwuphinine B ( <b>72</b> )                 | B-1 | 147         |
|                                                 | shawurensine ( <b>209</b> )                   | B-1 | 148         |
| <i>D. sharwurense</i>                           | sharwuphinine A ( <b>76</b> )                 | B-1 | 149         |
| <i>D. siwanense</i>                             | siwanine F ( <b>84</b> )                      | B-1 | 150         |
|                                                 | siwanine E ( <b>83</b> )                      | B-1 | 150,<br>102 |
| <i>D. siwanense</i> var. <i>leptogen</i>        | siwanine A ( <b>79</b> )                      | B-1 | 151         |
|                                                 | siwanine B ( <b>80</b> )                      | B-1 | 151         |
|                                                 | siwanine C ( <b>81</b> )                      | B-1 | 151         |
|                                                 | siwanine D ( <b>82</b> )                      | B-1 | 151         |
| <i>D. souliei</i>                               | soulidine ( <b>88</b> )                       | B-1 | 152         |



---

|                        |                                                     |     |     |
|------------------------|-----------------------------------------------------|-----|-----|
|                        | souline C ( <b>144</b> )                            | B-1 | 153 |
|                        | souline E ( <b>286</b> )                            | B-2 | 154 |
|                        | souline A ( <b>288</b> )                            | B-2 | 155 |
|                        | souline ( <b>297</b> )                              | B-2 | 153 |
|                        | souline F ( <b>349</b> )                            | C-1 | 154 |
|                        | souline B ( <b>318</b> )                            | B-3 | 155 |
| <i>D. stapeliosum</i>  | 14-demethyltuguaconitine ( <b>19</b> )              | A-1 | 156 |
|                        | 14-deacetyl-14-isobutyrylnudicauline ( <b>220</b> ) | B-1 | 130 |
|                        | 14-deacetyl-14-isobutyrylajadine ( <b>221</b> )     | B-1 | 130 |
| <i>D. staphisagria</i> | staphisadrine ( <b>267</b> )                        | B-2 | 157 |
|                        | staphisadrinine ( <b>291</b> )                      | B-2 | 157 |
|                        | delstaphisinine ( <b>307</b> )                      | B-2 | 158 |
|                        | 1-acetyldephisine ( <b>308</b> )                    | B-2 | 158 |
|                        | delstaphinine ( <b>256</b> )                        | B-2 | 159 |
|                        | delstaphisine ( <b>309</b> )                        | B-2 | 160 |
|                        | delstaphisagrine ( <b>310</b> )                     | B-2 | 160 |
|                        | delstaphisagnine ( <b>311</b> )                     | B-2 | 160 |
|                        | delstaphidine ( <b>257</b> )                        | B-2 | 161 |
|                        | neolinine ( <b>312</b> )                            | B-2 | 161 |
|                        | delstaphigine ( <b>314</b> )                        | B-2 | 162 |
|                        | 14-O-benzoyldelphonine ( <b>265</b> )               | B-2 | 162 |
|                        | Isoazitine ( <b>404</b> )                           | C-4 | 163 |
|                        | 19-oxodihydroatisine ( <b>408</b> )                 | C-4 | 163 |
|                        | 22-O-acetyl-19-oxodihydroatisine ( <b>409</b> )     | C-4 | 163 |
| <i>D. taliense</i>     | talitine B ( <b>97</b> )                            | B-1 | 164 |
|                        | talitine A ( <b>98</b> )                            | B-1 | 164 |
|                        | talitine C ( <b>96</b> )                            | B-1 | 164 |
| <i>D. tamarae</i>      | norsongoramine ( <b>418</b> )                       | C-6 | 165 |
| <i>D. tatsienense</i>  | tatsienenseine B ( <b>344</b> )                     | C-1 | 166 |
|                        | tatsienenseine C ( <b>345</b> )                     | C-1 | 166 |
|                        | tatsiensine ( <b>86</b> )                           | B-1 | 167 |
|                        | deacetylbanguine ( <b>202</b> )                     | B-1 | 167 |
|                        | delelatine ( <b>125</b> )                           | B-1 | 168 |
|                        | tatsinine ( <b>167</b> )                            | B-1 | 169 |
|                        | tatsienine-V ( <b>99</b> )                          | B-1 | 170 |
|                        | tatsienenseine A ( <b>380</b> )                     | C-2 | 166 |
|                        | tatsidine ( <b>101</b> )                            | B-1 | 171 |
|                        | deltatsine ( <b>169</b> )                           | B-1 | 172 |
|                        | tatsirine ( <b>374</b> )                            | C-1 | 173 |
| <i>D. tianshanicum</i> | tianshanitine A ( <b>174</b> )                      | B-1 | 174 |
|                        | tianshanitine B ( <b>175</b> )                      | B-1 | 174 |
|                        | tianshanitine C ( <b>176</b> )                      | B-1 | 174 |
|                        | tianshanitine D ( <b>116</b> )                      | B-1 | 174 |

---

|                           |                           |     |     |
|---------------------------|---------------------------|-----|-----|
|                           | tianshanitine E (59)      | B-1 | 174 |
|                           | tianshanisine (27)        | B-1 | 175 |
|                           | tianshanine (181)         | B-1 | 175 |
|                           | tianshanidine (57)        | B-1 | 175 |
| <i>D. tiantaishanense</i> | tiantaishannine (132)     | B-1 | 176 |
|                           | tiantaishanmine (61)      | B-1 | 176 |
|                           | tiantaishandine (348)     | C-1 | 176 |
|                           | tiantaishansine (20)      | A-1 | 176 |
| <i>D. ternatum</i>        | dehydroeldelidine (126)   | B-1 | 177 |
|                           | delterine (41)            | B-1 | 178 |
|                           | terdeline (152)           | B-1 | 179 |
|                           | ternatine (356)           | C-1 | 180 |
| <i>D. tongolense</i>      | tongoline (139)           | B-1 | 181 |
|                           | tongolenine C (62)        | B-1 | 182 |
| <i>D. trichophorum</i>    | trichodelphinine F (419)  | C-7 | 183 |
|                           | trichodelphinine A (350)  | C-1 | 183 |
|                           | trichodelphinine B (351)  | C-1 | 183 |
|                           | trichodelphinine C (352)  | C-1 | 183 |
|                           | trichodelphinine D (353)  | C-1 | 183 |
|                           | trichodelphinine E (354)  | C-1 | 183 |
| <i>D. trifoliolatum</i>   | trifoliolasine A (230)    | B-1 | 184 |
|                           | trifoliolasine B (231)    | B-1 | 184 |
|                           | trifoliolasine C (232)    | B-1 | 184 |
|                           | trifoliolasine D (381)    | C-2 | 185 |
|                           | trifoliolasine E (382)    | C-2 | 185 |
|                           | trifoliolasine F (383)    | C-2 | 185 |
| <i>D. umbrosum</i>        | umbrosumine A (241)       | B-1 | 186 |
|                           | umbrosumine B (242)       | B-1 | 186 |
|                           | umbrosumine C (243)       | B-1 | 186 |
| <i>D. uncinatum</i>       | uncinatine (414)          | C-4 | 187 |
|                           | 14-acetylchasmanine (316) | B-2 | 188 |
| <i>D. uralense</i>        | 19-oxodeltaline (32)      | B-1 | 189 |
|                           | 6-oxocorumdaphine (128)   | B-1 | 190 |
|                           | 18-methoxyeladine (129)   | B-1 | 190 |
| <i>D. venulosum</i>       | venudelphine (378)        | C-1 | 191 |
|                           | venulol (368)             | C-1 | 192 |
|                           | venuluson (369)           | C-1 | 192 |
| <i>D. vestitum</i>        | isodelectine (215)        | B-1 | 193 |
|                           | delvestine (250)          | B-1 | 194 |
|                           | delvestidine (251)        | B-1 | 194 |
| <i>D. yunnanense</i>      | yunnanenseine B (342)     | C-1 | 195 |
|                           | yunnanenseine C (343)     | C-1 | 195 |
|                           | yunnanenseine A (321)     | B-4 | 195 |
|                           | yunnadelphinine (93)      | B-1 | 196 |

Table 1S. DAs from *Delphinium* plants

**Ref.**

1. A. Ulubelen, H. K. Desai, B. S. Joshi, V. Venkateswarlu, S. W. Pelletier, A. H. Mericli, F. Mericli and H. Ozelik, *J. Nat. Prod.*, 1995, 58, 1555-1561.
2. E. D. Khairitdinova, E. M. Tsyrlina, L. V. Spirikhin, N. I. Fedorov and M. S. Yunusov, *Chem. Nat. Compd.*, 2005, 41, 575-577.
3. S. W. Pelletier, A. MUKENDI PANU, P. KULANTHAIVEL and J. D. Olsen, *Heterocycles*, 1988, 27, 2387-2393.
4. B. S. Joshi, M. S. Puar, Y. Bai, A. M. Panu and S. W. Pelletier, *Tetrahedron* 1994, 50, 12283-12292.
5. J. Z. Jin and M. C. Zhong, *Chinese Tradit. Herbal Drugs*, 1986, 17, 1-3.
6. S. Fang and M. Benn, *Phytochemistry*, 1992, 31, 3247-3250.
7. S. Wang, X. L. Zhou, X. M. Gong, X. Y. Fan and M. S. Lan, *J. Asian Nat. Prod. Res.*, 2016, 18, 141-146.
8. L. Shan, J. Zhang, L. Chen, J. Wang, S. Huang and X. Zhou, *Nat. Prod. Commun.*, 2015, 10, 2067-2068.
9. L. H. Shan, J. F. Zhang, F. Gao, S. Huang and X. L. Zhou, *J. Asian Nat. Prod. Res.*, 2018, 20, 423-430.
10. L. H. Shan, J. F. Zhang, F. Gao, S. Huang and X. L. Zhou, *Sci. Rep.*, 2017, 7, 6063.
11. L. Song, X. X. Liang, D. L. Chen, X. X. Jian and F. P. Wang, *Chem. Pharm. Bull.*, 2007, 55, 918-921.
12. L. Song, X. Y. Liu, Q. H. Chen and F. P. Wang, *Chem. Pharm. Bull.*, 2009, 57, 158-161.
13. X. Y. Liu, Q. H. Chen and F. P. Wang, *Chin. Chem. Lett.*, 2009, 20, 698-701.
14. X. Y. Liu, L. Song, Q. H. Chen and F. P. Wang, *Nat. Prod. Commun.*, 2010, 5, 1005-1008.
15. X. Y. Liu, Q. H. Chen and F. P. Wang, *Helv. Chim. Acta*, 2009, 92, 745-752.
16. L. Yang, Y. B. Zhang, L. Zhuang, T. Li, N. H. Chen, Z. N. Wu, P. Li, Y. L. Li and G. C. Wang, *Planta Med.*, 2017, 83, 111-116.
17. H. K. Desai, B. T. Cartwright and S. W. Pelletier, *J. Nat. Prod.*, 1994, 57, 677-682.
18. X. Liang, S. A. Ross, Y. R. Sohni, H. M. Sayed, H. K. Desai, B. S. Joshi and S. W. Pelletier, *J. Nat. Prod.*, 1991, 54, 1283-1287.
19. B. S. Joshi, M. S. Puar, H. K. Desai, S. A. Ross, J. Lu and S. W. Pelletier, *Tetrahedron Lett.*, 1993, 34, 1441-1444.
20. J. Lu, H. K. Desai, S. A. Ross, H. M. Sayed and S. W. Pelletier, *J. Nat. Prod.*, 1993, 56, 2098-2103.
21. B. S. Joshi, E. S. A. El-Kashoury, H. K. Desai, E. M. Holt, J. D. Olsen and S. W. Pelletier, *Tetrahedron Lett.*, 1988, 29, 2397-2400.
22. S. W. Pelletier, P. Kulanthaivel and J. D. Olsen, *Phytochemistry*, 1989, 28, 1521-1525.
23. G. D. Manners, R. Y. Wong, M. Benson, M. H. Ralphs and J. A. Pfister, *Phytochemistry*, 1996, 42, 875-879.
24. P. Kulanthaivel, E. M. Holt, J. D. Olsent and S. W. Pelletier, *Phytochemistry*, 1990, 29, 293-295.
25. B. S. Joshi, H. K. Desai, E. S. A. El-kashoury, S. W. Pelletier and J. D. Olsent, *Phytochemistry*,

- 1989, 28, 1561-1563.
26. P. Kulanthaivel, M. Benn and W. Majak, *Phytochemistry*, 1986, 25, 1511-1513.
  27. Q. P. Jiang and W. L. Sung, *Heterocycles*, 1985, 23, 11-15.
  28. Y. He, D. L. Chen and F. P. Wang, *Nat. Prod. Commun.*, 2006, 1, 357-362.
  29. W. Deng and W. L. Sung, *Heterocycles*, 1986, 24, 873-876.
  30. A. Ulubelen, H. K. Desai, Q. Teng, A. H. Mericli, F. Meriçli, U. S. Kolak and S. W. Pelletier, *Heterocycles*, 1999, 8, 1897-1903.
  31. W. Deng and W. L. Sung, *Heterocycles*, 1986, 24, 869-872.
  32. L. Bitiş, S. Suezgec, U. Sözer, H. Oezcelik, J. Zapp, A. K. Kierner and A. H. Mericli, *Helv. Chim. Acta*, 2007, 90, 2217-2221.
  33. L. P. Yan, D. L. Chen and F. P. Wang, *Chinese J. Org. Chem.*, 2007, 27, 976-980.
  34. C. Z. Lin, Z. J. Liu, Z. D. Bairy and C. C. Zhu, *Chinese J. Nat. Med.*, 2017, 15, 45-48.
  35. Y. Wang, S. N. Chen, Y. Pan, J. Zhang and Y. Chen, *Phytochemistry*, 1996, 42, 569-571.
  36. Y. Wang, Y. J. Pan, S. N. Chen and Y. Z. Chen, *Chin. Chem. Lett.*, 1996, 7, 139-140.
  37. Y. J. Pan, R. Wang, S. N. Chen and Y. Z. Chen, *Chem. Res. Chinese U.*, 1992, 13, 1418-1419.
  38. A. H. Meriçli, F. Meriçli, E. Doğru, H. Özçelik and A. Ulubelen, *Phytochemistry*, 1999, 51, 337-340.
  39. S. W. Pelletier, N. V. Mody and R. C. Desai, *Heterocycles*, 1981, 16, 747-750.
  40. M. Reina, A. Madinaveitia, J. Gavín and G. de la Fuente, *Phytochemistry*, 1996, 41, 1235-1250.
  41. A. G. Gonzalez, G. De la Fuente, M. Reina, P. G. Jones and P. R. Raithby, *Tetrahedron Lett.*, 1983, 24, 3765-3768.
  42. A. G. Gonzalez, G. De la Fuente, M. Reina, V. Zabel and W. H. Watson, *Tetrahedron Lett.*, 1980, 21, 1155-1158.
  43. M. Reina, A. Madinaveitia and G. De La Fuente, *Phytochemistry*, 1997, 45, 1707-1711.
  44. M. Reina, A. Madinaveitia, G. de la Fuente, M. L. Rodriguez and I. Brito, *Tetrahedron Lett.*, 1992, 33, 1661-1662.
  45. A. G. d. I. F. Gonzalez, G.; Reina, M., *Anales de Quimica, Serie C: Quimica Organica y Bioquimica*, 1981, 77, 171-173.
  46. M. Shamma, P. Chinnasamy, G. A. Miana, A. Khan, M. Bashir, M. Salazar and J. L. Beal, *J. Nat. Prod.*, 1979, 42, 615-623.
  47. Y. Q. He, X. M. Wei, Y. L. Han and L. M. Gao, *Chin. Chem. Lett.*, 2007, 18, 545-547.
  48. Y. Q. He, Z. Y. Ma, X. M. Wei, B. Z. Du, Z. X. Jing, B. H. Yao and L. M. Gao, *Fitoterapia*, 2010, 81, 929-931.
  49. Y. He, D. Zhang and L. M. West, *Fitoterapia*, 2019, 139, 104407.
  50. A. S. Narsullaev, M. S. Yunusov, V. M. Matveev and S. S. Sabirov, *Chem. Nat. Compd.*, 1989, 25, 41-42.
  51. Z. M. Vaisov and M. S. Yunusov, *Chem. Nat. Compd.*, 1986, 22, 744-745.
  52. Z. M. Vaisov and M. S. Yunusov, *Chem. Nat. Compd.*, 1987, 23, 725-727.
  53. B. T. Salimov, *Chem. Nat. Compd.*, 2001, 37, 272-273.
  54. B. T. Salimov, *Chem. Nat. Compd.*, 2004, 40, 579-581.
  55. A. S. Narzullaev, M. S. Yunusov and S. S. Sabirov, *Chem. Nat. Compd.*, 1989, 25, 43-43.
  56. B. T. Salimov, M. S. Yunusov, N. D. Abdullaev and Z. M. Vaisov, *Chem. Nat. Compd.*, 1985, 21, 91-94.

57. B. T. Salimov, M. S. Yunusov, N. D. Abdullaev and Z. M. Vaisov, *Khimiya Prirodnykh Soedinenii*, 1985 95-98.
58. G. de la Fuente, J. A. Gavin, R. D. Acosta and F. Sanchez-Ferrando, *Phytochemistry*, 1993, 34, 553-558.
59. M. Reina, J. A. Gavín, A. Madinaveitia, R. D. Acosta and G. De La Fuente, *J. Nat. Prod.*, 1996, 59, 145-147.
60. A. Ulubelen, A. H. Meriçli, F. Meriçli, U. S. Kolak, R. Ilarslan and W. Voelter, *Phytochemistry*, 1999, 50, 513-516.
61. E. D. Khairitdinova, E. M. Tsirlina, L. V. Spirikhin, N. I. Fedorov, Y. Y. Efremov and M. S. Yunusov, *Russ. Chem. Bull.*, 2003, 52, 2078-2080.
62. E. D. Khairitdinova, E. M. Tsirlina, L. V. Spirikhin, N. I. Fedorov and M. S. Yunusov, *Chem. Nat. Compd.*, 2005, 41, 572-574.
63. A. H. Mericli, F. Mericli, G. V. Seyhan, H. Özçelik, N. Kılınçer, A. G. Ferizli and A. Ulubelen, *Heterocycles*, 1999, 8, 1843-1848.
64. A. Ulubelen, H. K. Desai, S. K. Srivastava, B. P. Hart, J. C. Park, B. S. Joshi and R. Ilarslan, *J. Nat. Prod.*, 1996, 59, 360-366.
65. X. X. Liang, D. L. Chen and F. P. Wang, *Chin. Chem. Lett.*, 2006, 17, 1473-1476.
66. S. W. Pelletier, F. M. Harraz, M. M. Badawi, S. Tantiraskachai, F. P. Wang and S. Y. Chen, *Heterocycles*, 1986, 24, 1853-1865.
67. J. Y. Sun and T. C. Li, *J. Chem. Res.*, 2009, 2009, 306-307.
68. H. Ahmad, S. Ahmad, M. Ali, A. Latif, S. A. A. Shah, H. Naz, N. Ur Rahman, F. Shaheen, A. Wadood, H. U. Khan and M. Ahmad, *Bioorg. Chem.*, 2018, 78, 427-435.
69. Atta-ur-Rahman, A. Nasreen, F. Akhtar, M. S. Shekhani, J. Clardy, M. Parvez and M. I. Choudhary, *J. Nat. Prod.*, 1997, 60, 472-474.
70. H. Yamashita, M. Katoh, A. Kokubun, A. Uchimura, S. Mikami, A. Takeuchi, K. Kaneda, Y. Suzuki, M. Mizukami, M. Goto, K. H. Lee and K. Wada, *Phytochem. Lett.*, 2018, 24, 6-9.
71. S. W. Pelletier, S. A. Ross and P. Kulanthaivel, *Tetrahedron*, 1989, 45, 1887-1892.
72. K. Wada, E. Asakawa, Y. Tosho, A. Nakata, Y. Hasegawa, K. Kaneda, M. Goto, H. Yamashita and K. H. Lee, *Phytochem. Lett.*, 2016, 17, 190-193.
73. K. Wada, R. Chiba, R. Kanazawa, K. Matsuoka, M. Suzuki, M. Ikuta, M. Goto, H. Yamashita and K. H. Lee, *Phytochem. Lett.*, 2015, 12, 79-83.
74. K. Wada, T. Yamamoto, H. Bando and N. Kawahara, *Phytochemistry*, 1992, 31, 2135-2138.
75. S. A. Ross, B. S. Joshi, H. K. Desai, S. W. Pelletier, M. G. Newton, X. Zhang and J. K. Snyder, *Tetrahedron*, 1991, 47, 9585-9598.
76. J. C. Park, H. K. Desai and S. W. Pelletier, *J. Nat. Prod.*, 1995, 58, 291-295.
77. N. Batbayar, S. Enkhzaya, J. Tunsag, D. Batsuren, D. S. Rycroft, S. Sproll and F. Bracher, *Phytochemistry*, 2003, 62, 543-550.
78. S. Zhang, G. Zhao and G. Lin, *Phytochemistry*, 1999, 51, 333-336.
79. S. Pırıldar, Ç. Ünsal-Gürer, M. Koçyiğit, J. Zapp, A. K. Kierner and A. H. Meriçli, *Z. Naturforsch. C.*, 2012, 67, 541-544.
80. T. M. Gabbasov, E. M. Tsirlina, D. M. Anatov, L. V. Spirikhin and M. S. Yunusov, *Chem. Nat. Compd.*, 2017, 53, 105-108.
81. A. Ulubelen, A. H. Mericli, F. Mericli, R. Ilarslan and W. Voelter, *Phytochemistry*, 1993, 34, 1165-1167.

82. F. Meriçli, A. H. Meriçli, H. Becker, A. Ulubelen, S. Özden, N. Dürüst and M. Tanker, *Phytochemistry*, 1996, 42, 1249-1251.
83. D. L. Chen, P. Tang, Q. H. Chen and F. P. Wang, *Nat. Prod. Commun.*, 2014, 9, 623-625.
84. P. Tang, D. L. Chen, Q. H. Chen, X. X. Jian and F. P. Wang, *Chin. Chem. Lett.*, 2007, 18, 700-703.
85. J. A. Grina, D. R. Schroeder, E. T. Wydallis and F. R. Stermitz, *J. Org. Chem.*, 1986, 51, 390-394.
86. S. W. Pelletier, O. D. Dailey Jr, N. V. Mody and J. D. Olsen, *J. Org. Chem.*, 1981, 46, 3284-3293.
87. B. T. Salimov and M. S. Yunusov, *Khimiya Prirodnykh Soedinenii*, 1981, 530-531.
88. G. D. Manners, K. E. Panter, J. A. Pfister, M. H. Ralphs and L. F. James, *J. Nat. Prod.*, 1998, 61, 1086-1089.
89. X. L. Zhou, Q. H. Chen, D. L. Chen and F. P. Wang, *Chinese J. Chem.*, 2003, 21, 871-874.
90. X. L. Zhou, Q. H. Chen and F. P. Wang, *Heterocycles*, 2004, 63, 123-128.
91. X. L. Zhou, Q. H. Chen and F. P. Wang, *Chem. Pharm. Bull.*, 2004, 52, 456-458.
92. C. J. Li and D. H. Chen, *Acta Bot. Sin.*, 1993, 35, 80-80.
93. C. J. Li and D. H. Chen, *Acta Bot. Sin.*, 1992, 31, 466-469.
94. N. H. Chen, Y. B. Zhang, W. Li, P. Li, L. F. Chen, Y. L. Li, G. Q. Li and G. C. Wang, *RSC Adv.*, 2017, 7, 24129-24132.
95. C. J. Li and D. H. Chen, *Acta Chem. Sin.*, 1993, 51, 915-918.
96. Y. P. Deng, D. H. Chen and W. L. Song, *Acta Chem. Sin.*, 1992, 50, 822-826.
97. A. G. Gonzalez, R. Diaz Acosta, J. A. Gavin and G. De la Fuente, *Heterocycles*, 1986, 24, 2753-2756.
98. A. G. Gonzalez, G. de la Fuente, M. Reina and I. Timon, *Heterocycles*, 1984, 22, 667-669.
99. M. Reina, R. Mancha, A. Gonzalez-Coloma, M. Bailen, M. L. Rodriguez and R. A. Martinez-Diaz, *Nat. Prod. Res.*, 2007, 21, 1048-1055.
100. A. Ulubelen, A. H. Mericli, F. Mericli and R. Ilarslan, *Phytochemistry*, 1993, 33, 213-215.
101. F. P. Wang and S. W. Pelletier, *Acta Bot. Sin.*, 1990, 32, 733-736.
102. Y. Q. He, Z. Y. Ma, X. M. Wei, D. J. Liu, B. Z. Du, B. H. Yao and L. M. Gao, *Chem. Biodivers.*, 2011, 8, 2104-2109.
103. L. S. Ding and W. X. Chen, *Acta Pharm. Sin.*, 1990, 25, 438-440.
104. F. Shaheen, M. Ahmad, T. S. Rizvi and L. Ali, *Rec. Nat. Prod.*, 2015, 9, 76-80.
105. M. G. Zhamierashvili, V. A. Tel'Nov, M. S. Yunusov and S. Y. Yunusov, *Chem. Nat. Compd.*, 1980, 16, 479-480.
106. J. F. Zhang, R. Y. Dai, L. H. Shan, L. Chen, L. Xu, M. Y. Wu, C. J. Wang, S. Huang and X. L. Zhou, *Phytochem. Lett.*, 2016, 17, 299-303.
107. U. Kolak, M. Ozturk, F. Ozgokce and A. Ulubelen, *Phytochemistry*, 2006, 67, 2170-2175.
108. U. K. Kurbanov, B. Tashkhodzhaev, K. K. Turgunov and N. I. Mukarramov, *Chem. Nat. Compd.*, 2019, 55, 197-199.
109. Y. Bai and M. Benn, *Phytochemistry*, 1992, 31, 3243-3245.
110. M. H. Benn, I. Francis and R. M. Manavu, *Phytochemistry*, 1989, 28, 919-922.
111. F. Z. Chen, D. L. Chen, Q. H. Chen and F. P. Wang, *J. Nat. Prod.*, 2009, 72, 18-23.
112. Q. Zhao, X. J. Gou, W. Liu, G. He, L. Liang and F. Z. Chen, *Nat. Prod. Commun.*, 2015, 10, 2063-2064.

113. F. Sun, M. Benn and W. Majak, *Heterocycles*, 1991, 32, 1983-1988.
114. S. M. Zhang and Q. Y. Ou, *Chin. Chem. Lett.*, 1995, 6, 101-102.
115. G. de la Fuente, A. H. Meriçli, L. Ruiz-Mesía, A. Ulubelen, F. Meriçli and R. Ilarslan, *Phytochemistry*, 1995, 39, 1467-1473.
116. L. Shan, L. Chen, F. Gao and X. Zhou, *Nat. Prod. Res.*, 2018, DOI: 10.1080/14786419.2018.1475382, 1-6.
117. W. J. Xue, B. Zhao, J. Y. Zhao, S. Sh. Sagdullaev and H. Akber Aisa, *Phytochem. Lett.*, 2019, 33, 12-16.
118. F. Shaheen, M. Zeeshan, M. Ahmad, S. Anjum, S. Ali, H. K. Fun and Atta-ur-Rahman, *J. Nat. Prod.*, 2006, 69, 823-825.
119. P. Kulanthaivel and M. Benn, *Heterocycles*, 1985, 23, 2515-2520.
120. D. R. Gardner, G. D. Manners, K. E. Panter, S. T. Lee and J. A. Pfister, *J. Nat. Prod.*, 2000, 63, 1127-1130.
121. Y. Bai, M. Benn and W. Majak, *Heterocycles*, 1990, 31, 1233-1236.
122. Y. L. Bai, M. Benn and W. Majak, *Heterocycles* 1989, 29, 1017-1021.
123. M. Benn, J. F. Richardson and W. Majak, *Heterocycles*, 1986, 24, 1605-1607.
124. Y. Bai, F. Sun, M. Benn and W. Majak, *Phytochemistry*, 1994, 37, 1717-1724.
125. P. Kulanthaivel, S. W. Pelletier and J. D. Olsen, *Heterocycles*, 1988, 27, 339-342.
126. L. Ding, J. Wang, S. Peng and N. Chen, *Acta Bot. Sin.*, 2000, 42, 523-525.
127. H. Bando, K. Wada, J. Tanaka, S. Kimura, E. Hasegawa and T. Amiya, *Heterocycles*, 1989, 29, 1293-1300.
128. A. G. Gonzalez, G. De la Fuente and R. Diaz, *Phytochemistry*, 1982, 21, 1781-1782.
129. J. G. Diaz, J. G. Ruiz and W. Herz, *Phytochemistry*, 2004, 65, 2123-2127.
130. P. M. Shrestha and A. Katz, *J. Nat. Prod.*, 2004, 67, 1574-1576.
131. A. Ulubelen, A. H. Mericli, F. Mericli and R. Ilarslan, *Phytochemistry*, 1992, 31, 1019-1022.
132. G. De la Fuente, J. A. Gavin, R. Diaz Acosta and J. A. Morales, *Heterocycles*, 1988, 27, 1-5.
133. A. Ulubelen, A. H. Mericli and F. Mericli, *Nat. Prod. Lett.*, 1994, 5, 135-140.
134. G. de la Fuente and L. Ruiz-Mesía, *Phytochemistry*, 1995, 39, 1459-1465.
135. G. De la Fuente, R. Díaz Acosta and T. Orribo, *Heterocycles*, 1989, 29, 205-208.
136. Z. S. Boronova and M. N. Sultankhodzhaev, *Chem. Nat. Compd.*, 2000, 36, 390-392.
137. H. Pu, Q. Xu, F. Wang and C. T. Che, *Planta Med.*, 1996, 62, 462-464.
138. H. Y. Pu, F. P. Wang and C. T. Che, *Phytochemistry*, 1996, 43, 287-290.
139. H. Y. Pu and F. P. Wang, *Acta Pharm. Sin.*, 1994, 29, 692-692.
140. D. L. Chen, L. Y. Lin, Q. H. Chen, X. X. Jian and F. P. Wang, *J. Asian Nat. Prod. Res.*, 2003, 5, 209-213.
141. H. Y. Pu and F. P. Wang, *Chin. Chem. Lett.*, 1994, 5, 939-939.
142. X. L. Shen, X. L. Zhou, Q. H. Chen, D. L. Chen and F. P. Wang, *Chem. Pharm. Bull.*, 2002, 50, 1265-1267.
143. W. J. Xue, B. Zhao, Z. Ruzi, J. Y. Zhao and H. A. Aisa, *Phytochemistry*, 2018, 156, 234-240.
144. A. Ulubelen, M. Arfan, U. Sönmez, A. H. Meriçli and F. Meriçli, *Phytochemistry*, 1998, 48, 385-388.
145. S. A. Saidkhodzhaeva and I. A. Bessonova, *Chem. Nat. Compd.*, 1996, 32, 720-722.
146. A. Ulubelen, A. H. Meriçli, F. Meriçli, U. Kolak, M. Arfan, M. Ahmad and H. Ahmad, *Heterocycles*, 2000, 53, 2279-2282.

147. B. Zhao, S. K. Usmanova, A. Yili, A. Kawuli, R. Abdulla and H. A. Aisa, *Chem. Nat. Compd.*, 2015, 51, 519-522.
148. D. Y. Gu, H. A. Aisa and S. K. Usmanova, *Chem. Nat. Compd.*, 2007, 43, 298-301.
149. C. Li, Y. Hirasawa, H. Arai, H. Akber Aisa and H. Morita, *Heterocycles*, 2010, 80, 607-612.
150. Z. Suoming, Z. Guiling and G. Lin, *Phytochemistry*, 1997, 45, 1713-1716.
151. S. Zhang and Q. Ou, *Phytochemistry*, 1998, 48, 191-196.
152. L. He, Y. J. Pan, B. G. Li and Y. Z. Chen, *Chin. Chem. Lett.*, 1999, 10, 1027-1028.
153. K. Zhang, L. He, X. Pan and Y. Chen, *Planta Med.*, 1998, 64, 580-581.
154. L. He, Y. J. Pan, X. Pan, B. G. Li and Y. Z. Chen, *Chin. Chem. Lett.*, 1999, 10, 395-396.
155. X. Pan, L. He, B. G. Li and Y. Z. Chen, *Chin. Chem. Lett.*, 1998, 9, 57-59.
156. P. M. Shrestha and A. Katz, *J. Nat. Prod.*, 2000, 63, 2-5.
157. X. Liang, H. K. Desai and S. W. Pelletier, *J. Nat. Prod.*, 1990, 53, 1307-1311.
158. S. A. Ross and W. Pelletier, *J. Nat. Prod.*, 1988, 51, 572-577.
159. S. W. Pelletier and M. M. Badawi, *J. Nat. Prod.*, 1987, 50, 381-385.
160. S. W. Pelletier and M. M. Badawi, *Heterocycles*, 1985, 23, 2873-2883.
161. S. A. Ross, H. K. Desai and S. W. Pelletier, *Heterocycles*, 1987, 26, 2895-2904.
162. S. W. Pelletier, S. A. Ross and J. T. Etse, *Heterocycles*, 1988, 27, 2467-2473.
163. J. G. Díaz, J. G. Ruiz and G. de la Fuente, *J. Nat. Prod.*, 2000, 63, 1136-1139.
164. S. Y. Chen and X. J. Hao, *Acta Bot. Yunanica.*, 1986, 8, 81-86.
165. L. V. Beshitaishvili, M. N. Sultankhodzhaev, K. S. Mudzhiri and M. S. Yunusov, *Chem. Nat. Compd.*, 1981, 17, 156-157.
166. F. Z. Chen, Q. H. Chen, X. Y. Liu and F. P. Wang, *Helv. Chim. Acta*, 2011, 94, 853-858.
167. S. W. Pelletier, J. A. Glinski, S. S. Joshi and C. Szu-ying, *Heterocycles*, 1983, 20, 1347-1354.
168. S. A. Ross, H. K. Desai, B. S. Joshi, S. K. Srivastava, J. A. Glinski, Y. C. Si and S. W. Pelletier, *Phytochemistry*, 1988, 27, 3719-3721.
169. J. A. Glinski, B. S. Joshi, S. Y. Chen and S. W. Pelletier, *Tetrahedron Lett.*, 1984, 25, 1211-1214.
170. M. X. Yu, Y. J. Pan and Y. Z. Chen, *Chinese J. Org. Chem.*, 2003, 23, 563-565.
171. B. S. Joshi, H. K. Desai, S. W. Pelletier, J. K. Snyder, X. Zhang and S. Y. Chen, *Phytochemistry*, 1990, 29, 357-358.
172. B. S. Joshi, J. A. Glinski, H. P. Chokshi, S. Chen, S. K. Srivastava and S. W. Pelletier, *Heterocycles*, 1984, 22, 2037-2042.
173. X. L. Zhang and J. K. Snyder, *Heterocycles*, 1990, 31, 1879-1888.
174. J. F. Zhang, L. H. Shan, F. Gao, S. Huang and X. L. Zhou, *Chem. Biodivers.*, 2017, 14, e1600297.
175. B. Zhao, S. Usmanova and H. A. Aisa, *Phytochem. Lett.*, 2014, 10, 189-192.
176. J. Li, D. L. Chen, X. X. Jian and F. P. Wang, *Molecules*, 2007, 12, 353-360.
177. V. M. Matveev, A. S. Narzullaev, S. S. Sabirov and M. S. Yunusov, *Chem. Nat. Compd.*, 1985, 21, 133-134.
178. A. S. Narzullaev, V. M. Matveev, S. S. Sabirov and M. Y. Yunusov, *Chem. Nat. Compd.*, 1986, 22, 745-746.
179. A. S. Narzullaev, V. M. Matveev, N. D. Abdullaev, S. S. Sabirov and M. S. Yunusov, *Chem. Nat. Compd.*, 1988, 24, 335-338.
180. A. S. Narzullaev, N. D. Abdullaev, M. S. Yunusov, V. M. Matveev and S. G. Yunusova, *Russ.*



- Chem. Bull.*, 1997, 46, 184-185.
181. L. He, Y. Z. Chen, L. S. Ding and B. G. Li, *Chin. Chem. Lett.*, 1996, 7, 557-560.
  182. L. He, X. Pan, B. G. Li and Y. Z. Chen, *Chin. Chem. Lett.*, 1997, 8, 791-792.
  183. C. Z. Lin, Z. X. Zhao, S. M. Xie, J. H. Mao, C. C. Zhu, X. H. Li, B. Zeren-dawa, K. Suolang-qimei, D. Zhu, T. Q. Xiong and A. Z. Wu, *Phytochemistry*, 2014, 97, 88-95.
  184. X. L. Zhou, Q. H. Chen and F. P. Wang, *Chem. Pharm. Bull.*, 2004, 52, 381-383.
  185. X. L. Zhou, D. L. Chen, Q. H. Chen and F. P. Wang, *J. Nat. Prod.*, 2005, 68, 1076-1079.
  186. F. Z. Chen, Q. H. Chen and F. P. Wang, *J. Asian Nat. Prod. Res.*, 2010, 12, 498-504.
  187. A. Ulubelen, M. Arfan, U. Sönmez, A. H. Meriçli and F. Meriçli, *Phytochemistry*, 1998, 47, 1141-1144.
  188. U. S. Kolak and M. Ulusoylu, *Scientia Pharmaceutica*, 1998, 66, 381-385.
  189. T. M. Gabbasov, E. M. Tsyrlina, L. V. Spirikhin and M. S. Yunusov, *Chem. Nat. Compd.*, 2010, 46, 158-159.
  190. T. M. Gabbasov, E. M. Tsyrlina, L. V. Spirikhin, N. I. Fedorov and M. S. Yunusov, *Chem. Nat. Compd.*, 2008, 44, 745-748.
  191. A. Ulubelen, A. H. Mericli and F. Mericli, *J. Nat. Prod.*, 1993, 56, 780-781.
  192. A. Ulubelen, A. H. Mericli, F. Mericli, R. Ilarslan and S. A. Matlin, *Phytochemistry*, 1992, 31, 3239-3241.
  193. H. K. Desai, R. H. El Sofany and S. W. Pelletier, *J. Nat. Prod.*, 1990, 53, 1606-1608.
  194. H. K. Desai, B. S. Joshi and S. W. Pelletier, *Heterocycles*, 1985, 23, 2483-2487.
  195. F. Z. Chen, Q. H. Chen and F. P. Wang, *Helv. Chim. Acta*, 2011, 94, 254-260.
  196. S. D. Luo, M. M. Liu and W. X. Chen, *Acta Bot. Yunanica.*, 1984, 6, 108-110.
